# Supplementary material for: Behavior of ACRBP-deficient mouse sperm in the female reproductive tract
Source: PubMed Central journal article supplement — J Reprod Dev. 2018 Dec 29;65(2):97–102. doi: 10.1262/jrd.2018-137 (PMC6473115; doi:10.1262/jrd.2018-137), 2018-12-29
Supplement: jrd-65-097-s001.pdf [file jrd-65-097-s001.pdf]

## Supplementary Files

### **Behavior of ACRBP-deficient mouse sperm in the female reproductive tract**

Kiyoshi NAGASHIMA, Tomoyuki USUI, and Tadashi BABA

Correspondence: T Baba (e-mail: [baba.tadashi.gf@u.tsukuba.ac.jp](mailto:baba.tadashi.gf@u.tsukuba.ac.jp))

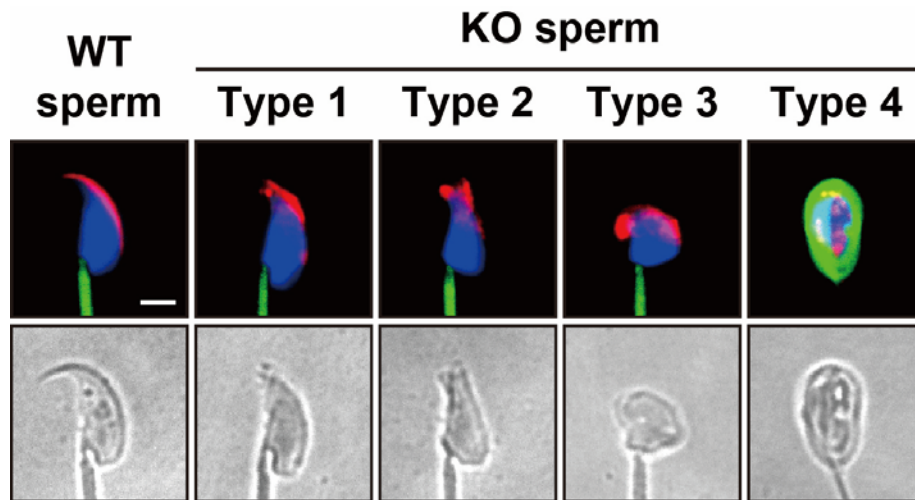

**Supplementary Fig. 1.**

Sperm morphology. Cauda epididymal sperm of wild-type (WT) and ACRBP-deficient (KO) mice were capacitated by incubation for 2 h in TYH drops, stained with Alexa Fluor 568-conjugated peanut agglutinin (red), MitoTracker Green FM (green), and Hoechst 33342 (blue), and then observed under a fluorescence microscope. KO sperm were morphologically divided into four types, types 1-4 (for details, see the text). Scale bar = 4  $\mu\text{m}$ .

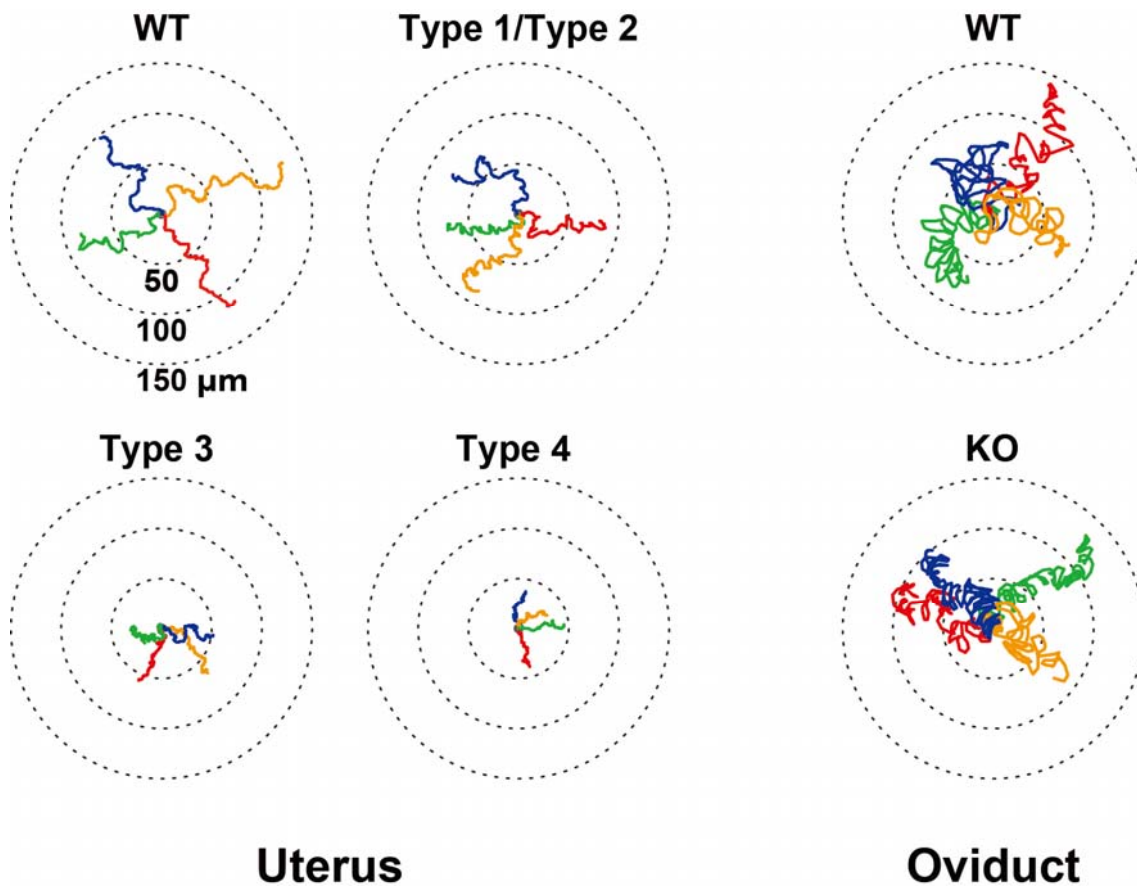

**Supplementary Fig. 2.**

Trajectories of sperm movement. Following mating between wild-type (WT) or ACRBP-deficient (KO) males and WT females, sperm were recovered from the uterus and oviduct 1.5 and 4 h after mating, respectively, and monitored by video recording at 200 frames/sec with a high-speed camera. Motile sperm were tracked by the Manual Tracking plugin of ImageJ software for 1 sec. Note that type-1 KO mouse sperm were morphologically indistinguishable from the type-2 sperm without staining the acrosome and nucleus.

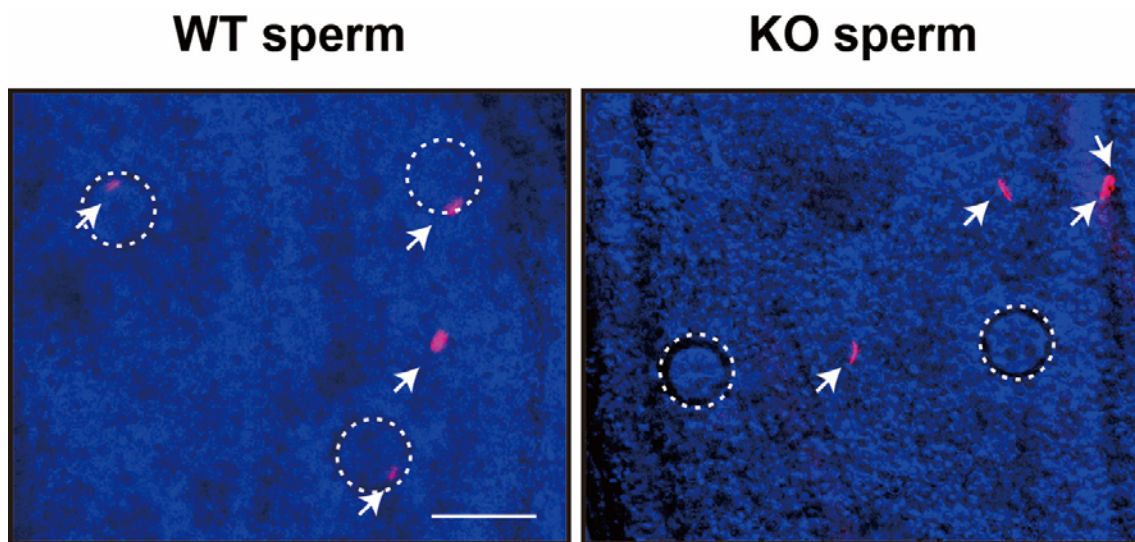

**Supplementary Fig. 3.**

Behavior of sperm in the oviductal ampulla (R7). The oocytes and fertilizing sperm are indicated by dotted circles and arrows, respectively. WT sperm, wild-type mouse sperm; KO sperm, ACRBP-deficient mouse sperm. Scale bar = 100  $\mu\text{m}$ .
